# Supplementary material for: The Outer Membrane Proteins OmpA, CarO, and OprD of Acinetobacter baumannii Confer a Two-Pronged Defense in Facilitating Its Success as a Potent Human Pathogen
Source: PubMed Central journal article supplement (PMC7573547; doi:10.3389/fmicb.2020.589234), 2020-10-06
Supplement: Data_Sheet_1.pdf [file Data_Sheet_1.pdf]

| <b>Feature</b>                                                                                                                                                     | <b>Reference</b>                                                                                             |
|--------------------------------------------------------------------------------------------------------------------------------------------------------------------|--------------------------------------------------------------------------------------------------------------|
| <b>Amino acid sequence</b>                                                                                                                                         |                                                                                                              |
| S182T mutation makes the strain resistant to carbapenems                                                                                                           | Abbasi <i>et al.</i> , 2020                                                                                  |
| AEVGTTGYG sequence at N-terminal is conserved.                                                                                                                     | Novovic, <i>et al.</i> , 2015                                                                                |
| Group I, II and III: each group has two variable regions VRs at the N-terminal and two hypervariable regions in between 135–180, and 203–240 amino acid positions. |                                                                                                              |
| 19 – 160 amino acids are most immunogenic                                                                                                                          | Tohidinia <i>et al.</i> , 2019                                                                               |
| Amino acid deletion at 133 and insertions at 140-141 and 154-156 complement with imipenem resistance.                                                              | Zhu <i>et al.</i> , 2019                                                                                     |
| <b>Transcriptional and post transcriptional regulation of CarO</b>                                                                                                 |                                                                                                              |
| CarO downregulates at osmotic stress and membrane bound CarO releases into supernatant.                                                                            | Hood <i>et al.</i> , 2009                                                                                    |
| Sub-MIC concentration of Tetracycline releases CarO into supernatant but does not alter transcription.                                                             | Yun <i>et al.</i> , 2008                                                                                     |
| Absence of CarO in OMPs despite the presence of gene is found in imipenem resistant <i>A. baumannii</i> .                                                          | Mussi <i>et al.</i> , 2005                                                                                   |
| In the absence of RNA chaperone Hfq, mRNA levels of CarO rise.                                                                                                     | Kuo <i>et al.</i> , 2017                                                                                     |
| <b>CarO variants and functional aspects</b>                                                                                                                        |                                                                                                              |
| K178 of CarO interacts with the periplasmic Oxa-23 protein to facilitate proin localized toxin inactivation.                                                       | Wu <i>et al.</i> , 2016                                                                                      |
| CarOa and CarOb classified on the basis of non-variable N-terminal domain (1-131) and two variable domains (132–162 and 200–238)                                   | Catel-Ferreira <i>et al.</i> , 2011                                                                          |
| CarOa and CarOb are both specific for imipenem uptake. L-ornithin competes with imipenem.                                                                          | Mussi <i>et al.</i> , 2007; Catel-Ferreira <i>et al.</i> , 2011                                              |
| CarOa is less specific to imipenem than CarOb                                                                                                                      | Catel-Ferreira <i>et al.</i> , 2011                                                                          |
| Insertion disruption of CarO by ISAbA 10, ISAbA 15, ISAbA36, ISAbA825, and ISAbA125 in Carbapenem resistant strains                                                | Mussi <i>et al.</i> , 2005; Khorsi <i>et al.</i> , 2018; Kim <i>et al.</i> , 2015; Lee <i>et al.</i> , 2010. |

Supplementary Table 1: Genetic basis of CarO function and its role in antibiotic resistance in *A. baumannii*.
